# Supplementary material for: Integrating network pharmacology, UPLC-Q–TOF–MS and molecular docking to investigate the effect and mechanism of Chuanxiong Renshen decoction against Alzheimer's disease
Source: PubMed Central journal article supplement (PMC9789652; doi:10.1186/s13020-022-00698-1), 2022-12-24
Supplement: 13020_2022_698_MOESM2_ESM.pdf [file 13020_2022_698_MOESM2_ESM.pdf]

**A**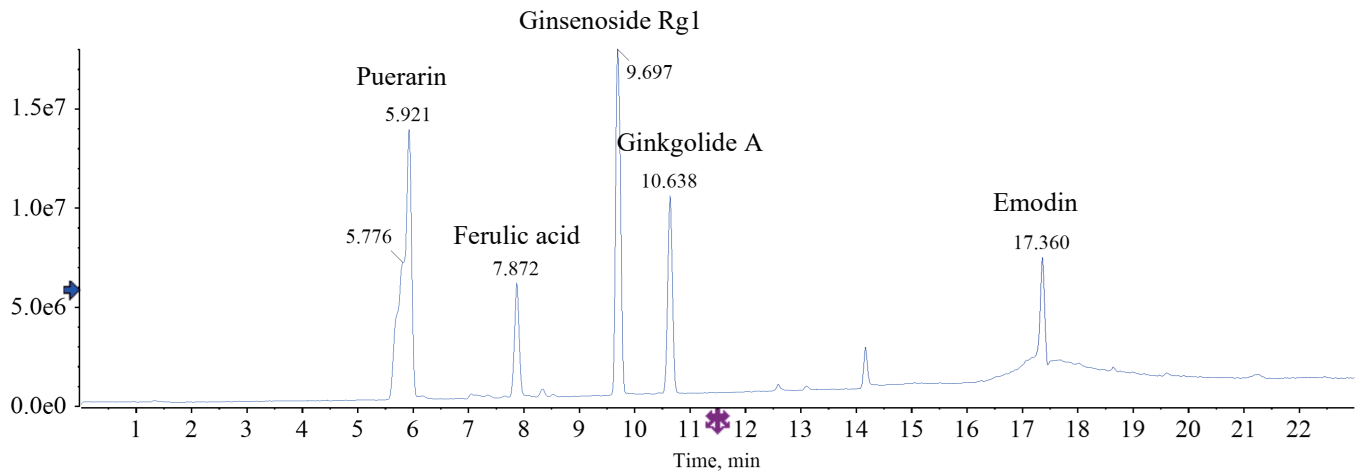**B**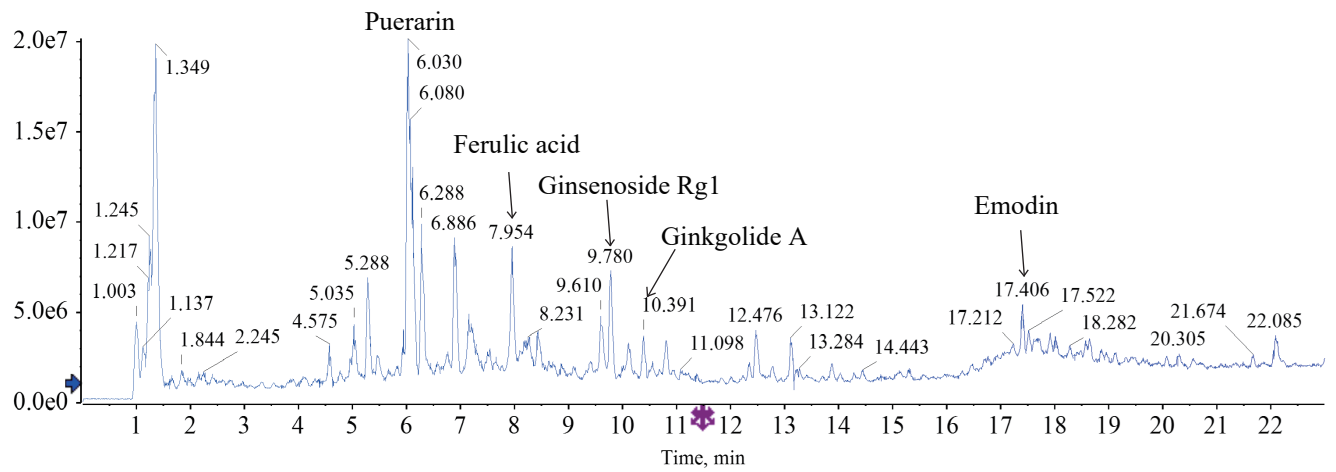

Supplementary Figure 2: The total ion chromatograms total ion chromatogram (TICs) of CRD(B) and Standard solution(A) by ultra-performance liquid chromatography-quadrupole-time-of-flight tandem mass (UPLC/Q-TOF-MS/MS).
