# Supplementary material for: Integrating network pharmacology, UPLC-Q–TOF–MS and molecular docking to investigate the effect and mechanism of Chuanxiong Renshen decoction against Alzheimer's disease
Source: PubMed Central journal article supplement (PMC9789652; doi:10.1186/s13020-022-00698-1), 2022-12-24

# F

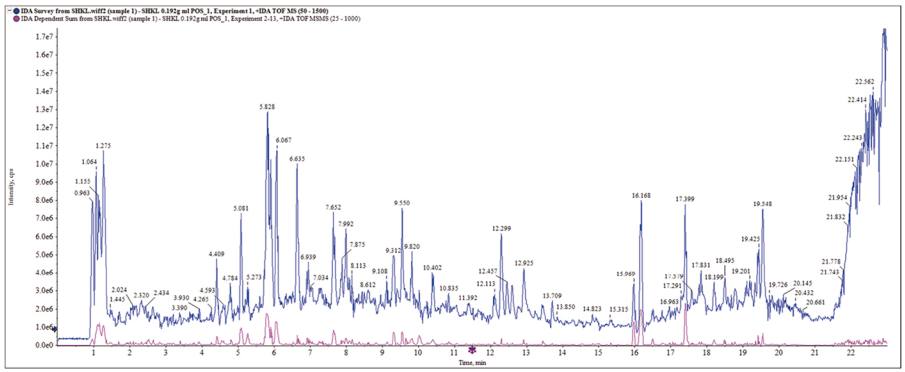

# G

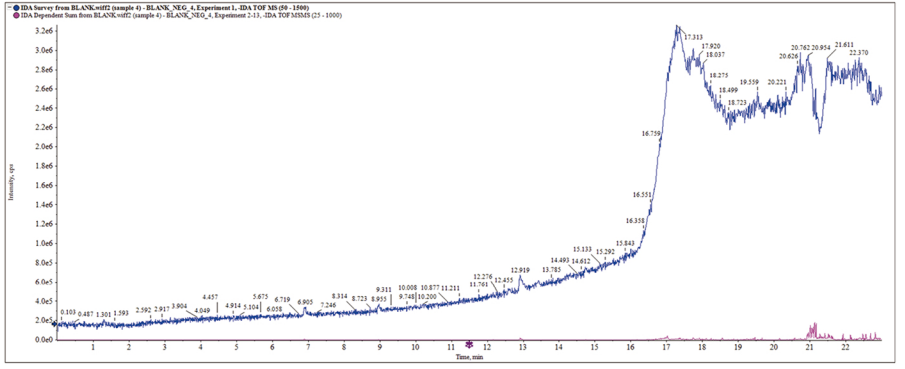

# H

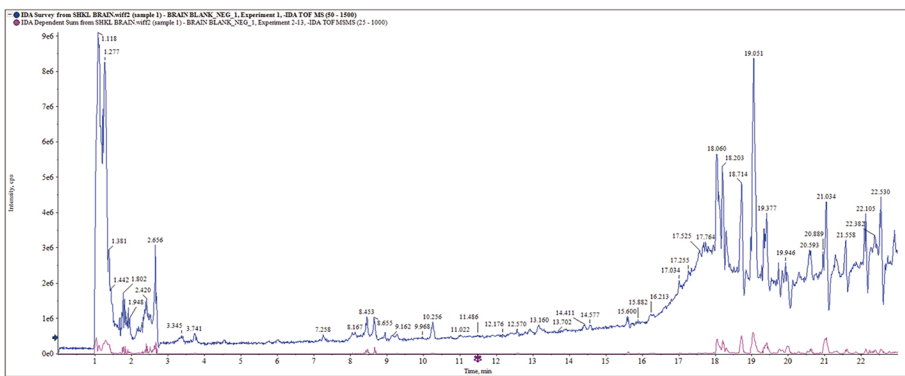

# I

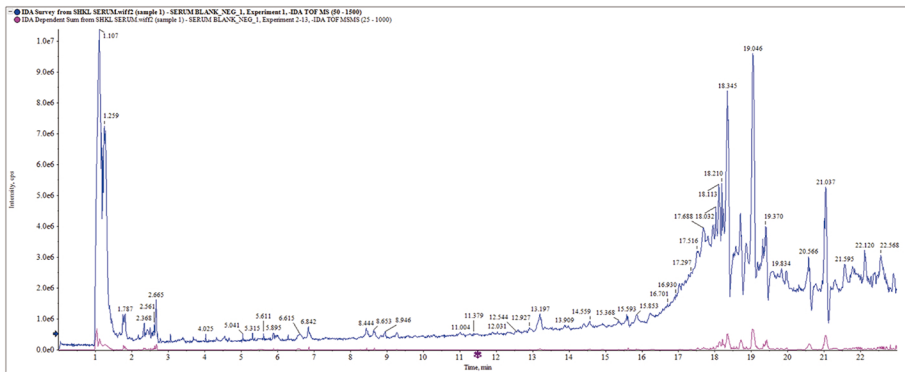

# J

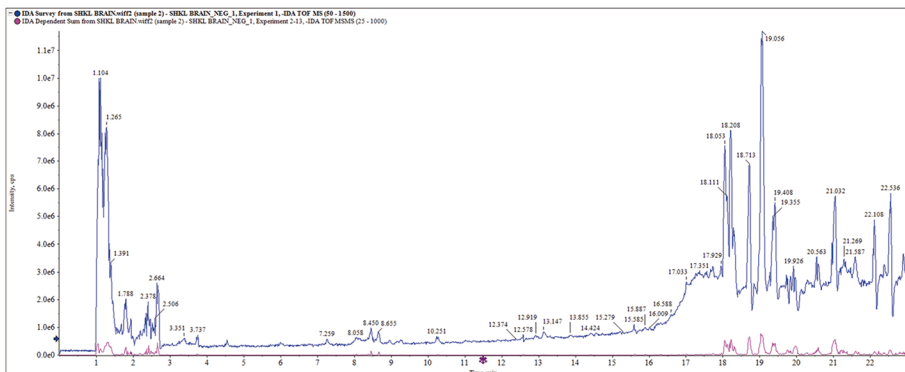

Supplement: 13020_2022_698_MOESM4_ESM.pdf [file 13020_2022_698_MOESM4_ESM.pdf]
